# Supplementary material
Source: PubMed Central journal article supplement (PMC1838646)
Supplement: pnas_0604716104_6.pdf [file pnas_0604716104_6.pdf]

**Table I. Summary of transplanted mice**

|                                              | Mouse No. | Time to CML/ALL (d) | Leukocyte peak (1000/ $\mu$ l) | Imatinib (mg bid) | Treatment begin (d) | Response duration (d) | Overall survival (d) | Primary phenotype | Resistant phenotype | Disease manifestation                |
|----------------------------------------------|-----------|---------------------|--------------------------------|-------------------|---------------------|-----------------------|----------------------|-------------------|---------------------|--------------------------------------|
| Primary Transplantation                      | I.        | 11                  | >100                           | -                 | -                   | -                     | 11                   | CML               | -                   | PB, spleen, BM                       |
|                                              | II.       | 15                  | 98                             | -                 | -                   | -                     | 15                   | CML               | -                   | PB, spleen, BM                       |
|                                              | III.      | 12                  | >100                           | -                 | -                   | -                     | 12                   | CML               | -                   | PB, spleen, BM                       |
|                                              | IV.       | 13                  | >100                           | -                 | -                   | -                     | 13                   | CML               | -                   | PB, spleen, BM                       |
| Secondary Transplantation - Imatinib treated | I.1       | 21                  | 71                             | 1                 | 22                  | 24                    | 49                   | CML               | ALL                 | ND                                   |
|                                              | I.2       | 20                  | 68                             | 1                 | 20                  | 23                    | 56                   | CML               | ALL                 | ND                                   |
|                                              | I.3       | 23                  | 23                             | 1                 | 23                  | 24                    | 57                   | CML               | B-ALL               | spleen, LK, BM, PB, paraspinal tumor |
|                                              | I.4       | 41                  | 480                            | 1                 | 45                  | 24                    | 84                   | CML               | CML                 | PB, spleen, BM                       |
|                                              | I.5       | 21                  | 95                             | 1                 | 22                  | 13                    | 43                   | CML               | B-ALL               | spleen, LK, BM, PB, paraspinal tumor |
|                                              | I.6       | 20                  | 100                            | 1                 | 21                  | 22                    | 59                   | CML               | B-ALL               | spleen, LK, BM, PB, paraspinal tumor |
|                                              | I.7       | 28                  | 30                             | 1                 | 29                  | 28                    | 65                   | CML               | B-ALL               | spleen, LK, BM, PB, paraspinal tumor |
|                                              | I.8       | 22                  | 380                            | 1                 | 29                  | 4                     | 43                   | CML               | CML                 | PB, spleen, BM                       |
|                                              | I.9       | 20                  | 120                            | 1                 | 22                  | 24                    | 59                   | CML               | B-ALL               | spleen, LK, BM, PB, paraspinal tumor |
|                                              | I.10      | NA                  | NA                             | -                 | -                   | -                     | 3                    | ND                | -                   | mouse died early - not analysed      |
| Secondary Transplantation - no treatment     | I.11      | 23                  | >100                           | -                 | -                   | -                     | 27                   | CML               | -                   | PB, spleen, BM                       |
|                                              | I.12      | 25                  | >100                           | -                 | -                   | -                     | 30                   | CML               | -                   | PB, spleen, BM                       |
|                                              | I.13      | 21                  | >100                           | -                 | -                   | -                     | 25                   | CML               | -                   | PB, spleen, BM                       |
|                                              | I.14      | 22                  | >100                           | -                 | -                   | -                     | 25                   | CML               | -                   | PB, spleen, BM                       |
|                                              | I.15      | 26                  | >100                           | -                 | -                   | -                     | 29                   | CML               | -                   | PB, spleen, BM                       |
| Tertiary Transplantation I                   | I.8.1     | 47                  | 72                             | 1                 | 60                  | 17                    | 83                   | CML               | CML                 | PB, spleen, BM                       |
|                                              | I.8.2     | 50                  | 180                            | 1                 | 52                  | 8                     | 65                   | CML               | ALL                 | ND                                   |
|                                              | I.8.3     | ND                  | 16                             | 1                 | 80                  | -                     | 94                   | ALL               | ALL                 | ND                                   |
|                                              | I.8.4     | 63                  | 46                             | 1                 | 12                  | -                     | 68                   | ALL               | B-/T-ALL            | spleen, LK, BM, PB, paraspinal tumor |
|                                              | I.8.5     | ND                  | 12                             | 1                 | 12                  | -                     | 690                  | No disease        | No disease          |                                      |
|                                              | I.8.6     | ND                  | 14                             | 1                 | 12                  | -                     | 175                  | ALL               | ALL                 | spleen, LK, BM, PB                   |
| Tertiary Transplantation II                  | I.3.1     | 9                   | ND                             | 1                 | 6                   | -                     | 15                   | B-ALL             | B-ALL               | spleen, LK, BM, PB, paraspinal tumor |
|                                              | I.3.2     | 10                  | ND                             | 2                 | 6                   | -                     | 20                   | B-ALL             | B-ALL               | spleen, LK, BM, PB, paraspinal tumor |
|                                              | I.3.3     | 11                  | ND                             | 4                 | 6                   | -                     | 20                   | B-ALL             | B-ALL               | spleen, LK, BM, PB, paraspinal tumor |
|                                              | I.9.1     | 9                   | ND                             | 1                 | 6                   | -                     | 15                   | B-ALL             | B-ALL               | spleen, LK, BM, PB, paraspinal tumor |
|                                              | I.9.2     | 8                   | ND                             | 2                 | 6                   | -                     | 13                   | B-ALL             | B-ALL               | spleen, LK, BM, PB, paraspinal tumor |
|                                              | I.9.3     | 10                  | ND                             | 4                 | 6                   | -                     | 16                   | B-ALL             | B-ALL               | spleen, LK, BM, PB, paraspinal tumor |
| Quaternary Transplantation                   | I.8.4.1   | 8                   | 37                             | -                 | -                   | -                     | 13                   | T-/B-ALL          | -                   | spleen, LK, BM, PB, paraspinal tumor |
|                                              | I.8.4.2   | 8                   | ND                             | -                 | -                   | -                     | 31                   | T-/B-ALL          | -                   | spleen, LK, BM, PB, paraspinal tumor |
|                                              | I.8.4.3   | 8                   | ND                             | 1                 | 2                   | -                     | 20                   | B-/T-ALL          | B-/T-ALL            | spleen, LK, BM, PB, paraspinal tumor |
|                                              | I.8.4.4   | 8                   | ND                             | 1                 | 2                   | -                     | 20                   | B-ALL             | B-ALL               | spleen, LK, BM, PB, paraspinal tumor |

CML - chronic myeloid leukemia

ALL - acute lymphoblastic leukemia

ND - not done

LK - lymph node

BM - bone marrow

PB - peripheral blood
