# Supplementary material
Source: PubMed Central journal article supplement (PMC1838646)
Supplement: pnas_0604716104_7.pdf [file pnas_0604716104_7.pdf]

**Table 2.** Summary of candidate genes flanking proviral insertion sites

| Mouse Number | Candidate Gene       | Ensembl Gene ID     | Gene function                                        | Mouse chromosome | Mouse chromosome position (megabases) | Corresponding human chromosome | Human chromosome position (megabases) |
|--------------|----------------------|---------------------|------------------------------------------------------|------------------|---------------------------------------|--------------------------------|---------------------------------------|
| I.2          | BCSC-1/LOH11CR2A*    | ENSMUSG00000038112  | Breast cancer suppressor candidate 1                 | 9                | 39.81                                 | 11                             | 123.5                                 |
| I.2          | Phldb2*              | ENSMUSG00000033149  | pleckstrin homology-like domain, family B, member 2  | 16               | 4.52                                  | 3                              | 112.9                                 |
| I.2          | Nfix                 | ENSMUSG00000001911  | ccaat-box binding transcription factor               | 8                | 84.31                                 | 19                             | 13.0                                  |
| I.4          | Atp9a                | ENSMUSG00000027546  | ATPase, class II, type 9A                            | 2                | 168.43                                | 20                             | 49.6                                  |
| I.4          | 5830482F20Rik        | ENSMUSG000000051735 | Splice Isoform 4 of Ras and Rab interactor 3 homolog | 7                | 25.74                                 | 19                             | 44.1                                  |
| I.4          | Kif13a/Nup153        | ENSMUSG000000021375 | Kinesin-like protein Kif13a                          | 13               | 46.36                                 | 6                              | 17.9                                  |
| I.6          | Novel/D930005D10Rik* | ENSMUSG000000029576 | RAS INTERACTING 1 RAIN                               | 5                | 141.41                                | 7                              | 4.8                                   |
| I.6          | Rps29                | ENSMUSG000000034892 | ribosomal protein                                    | 12               | 63.77                                 | 14                             | 48.0                                  |
| I.7          | Ush2a*               | ENSMUSG000000026609 | extracellular matrix protein                         | 1                | 189.56                                | 1                              | 213.4                                 |
| I.8          | Stk24                | ENSMUSG000000025556 | serine/threonine kinase                              | 14               | 112.63                                | 13                             | 96.8                                  |
| I.3.1        | Runx3                | ENSMUSG000000028814 | transcription factor                                 | 4                | 132.66                                | 1                              | 24.6                                  |
| I.3.1        | Irf2                 | ENSMUSG000000031627 | transcription factor                                 | 8                | 46.03                                 | 4                              | 186.0                                 |
| I.3.2        | Runx3                | ENSMUSG000000028814 | transcription factor                                 | 4                | 132.66                                | 1                              | 24.6                                  |
| I.3.2        | Hist1h2bf            | ENSMUSG000000049652 | histone protein                                      | 13               | 21.24                                 | 6                              | 26.4                                  |
| I.3.2        | Irf2                 | ENSMUSG000000031627 | transcription factor                                 | 8                | 46.03                                 | 4                              | 186.0                                 |
| I.3.3        | Rps29                | ENSMUSG000000050719 | ribosomal protein                                    | 12               | 63.77                                 | 14                             | 48.0                                  |
| I.8.1        | Stk24                | ENSMUSG000000025556 | serine/threonine kinase                              | 14               | 112.63                                | 13                             | 96.8                                  |
| I.8.4.1      | Rad51L1              | ENSMUST000000079533 | recombination repair protein                         | 12               | 74.51                                 | 14                             | 23.0                                  |
| I.8.4.2      | Rad51L1              | ENSMUST000000079533 | recombination repair protein                         | 12               | 74.51                                 | 14                             | 23.0                                  |

\* no LTR sequence detectable (see Materials and Methods)
