# Supplementary material
Source: PubMed Central journal article supplement (PMC1838646)

**A**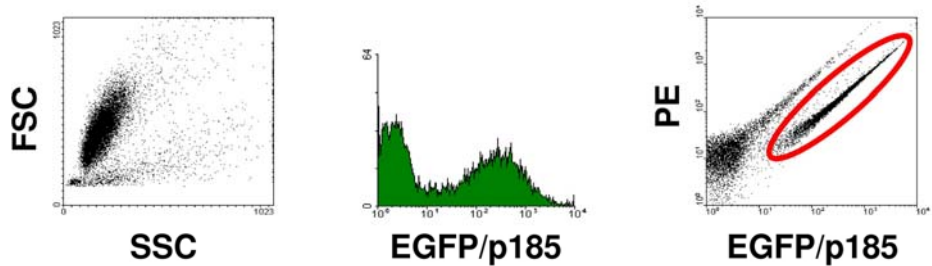**B**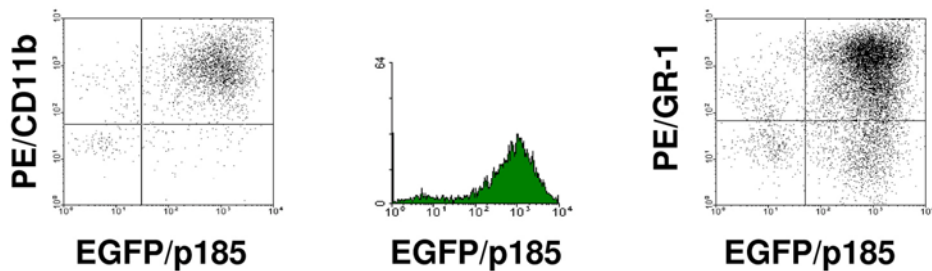**C**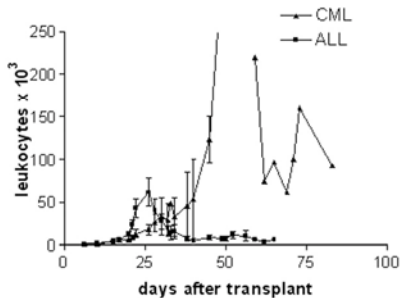

Supplement: pnas_0604716104_1.pdf [file pnas_0604716104_1.pdf]

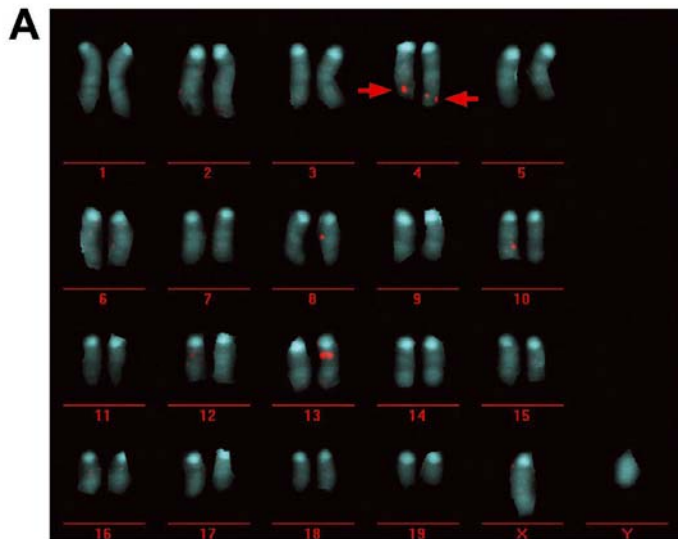

**B**

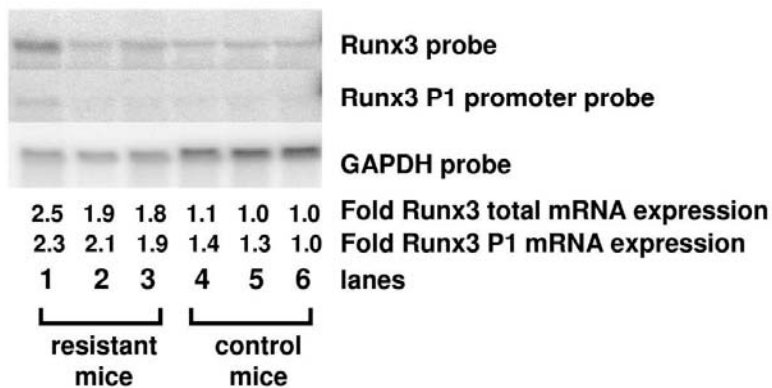

**C**

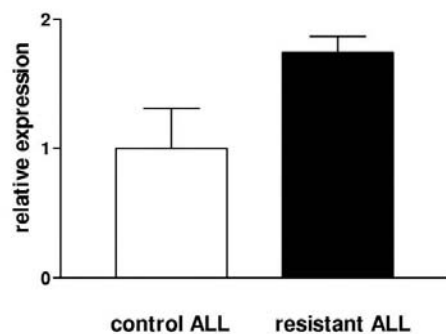

**D**

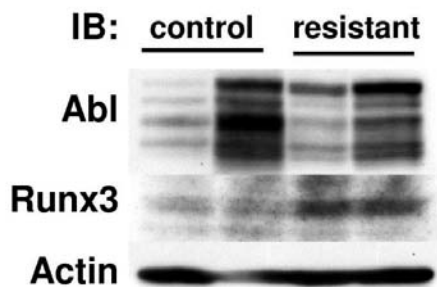

Supplement: pnas_0604716104_2.pdf [file pnas_0604716104_2.pdf]

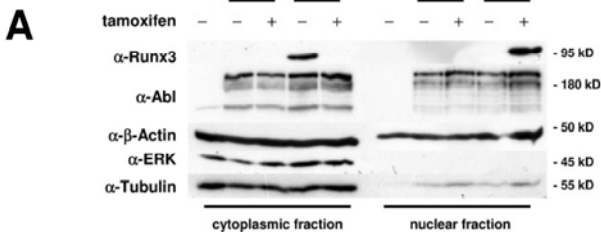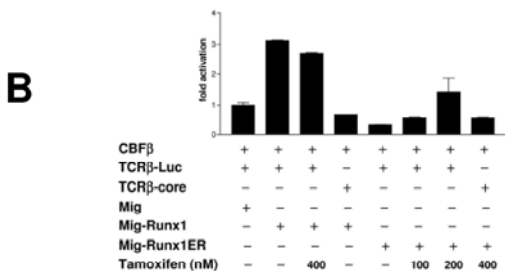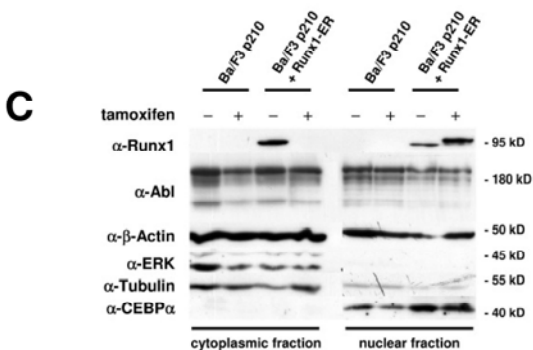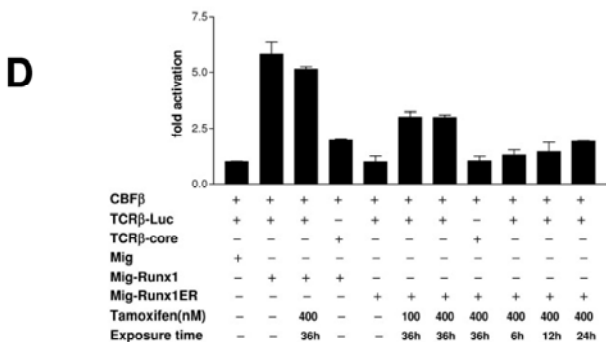

Supplement: pnas_0604716104_3.pdf [file pnas_0604716104_3.pdf]

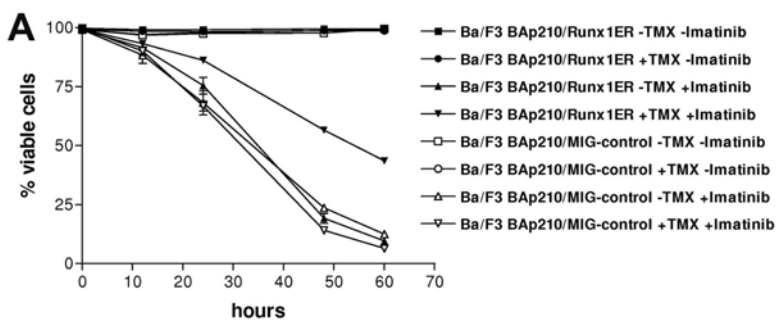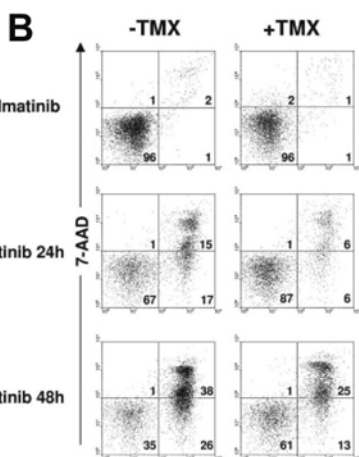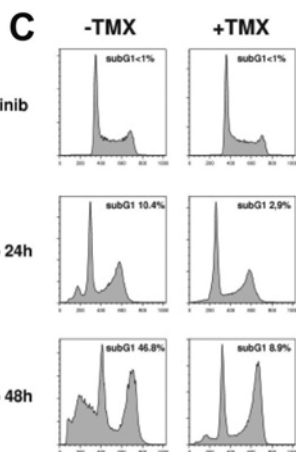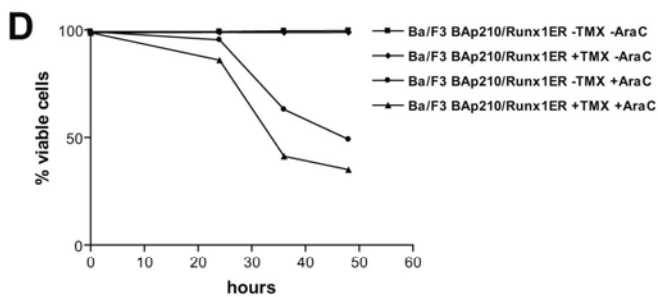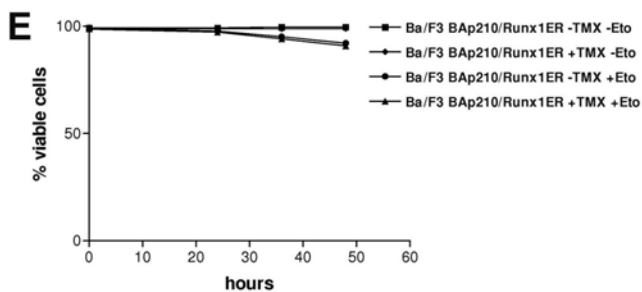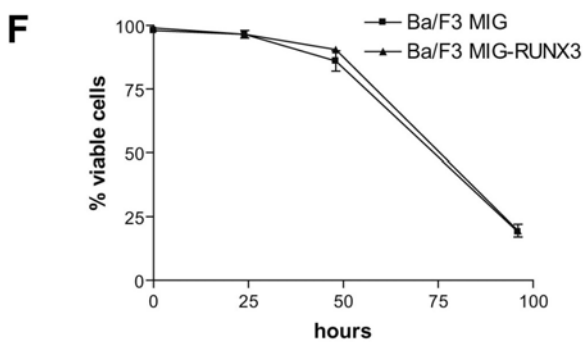

Supplement: pnas_0604716104_4.pdf [file pnas_0604716104_4.pdf]

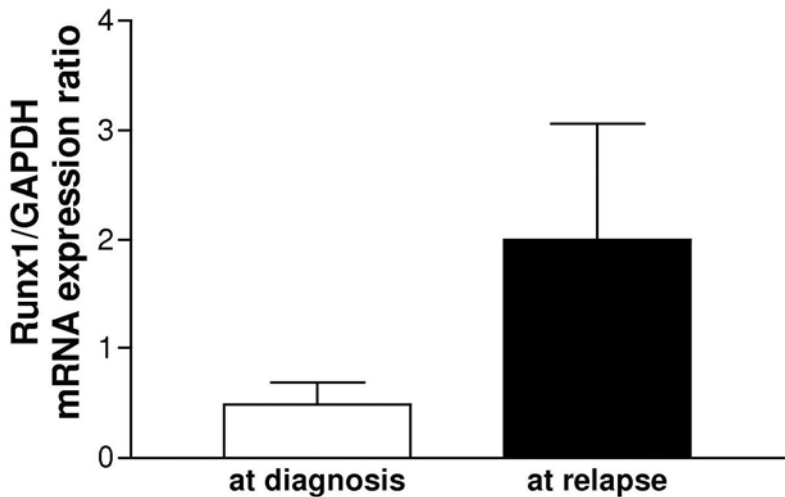

**Runx1 mRNA expression in leukemic cells from Ph<sup>+</sup> ALL patients**

Supplement: pnas_0604716104_5.pdf [file pnas_0604716104_5.pdf]
